# Supplementary material
Source: Springer Nature journal article supplement (https://www.springermedizin.de/resource/supplementary/12879_2011_1906_MOESM5_ESM.pdf/9443982)

Number of clusters

160  
140  
120  
100  
80  
60  
40  
20  
0

0

2

4

6

8

10

Number of matching cases in a cluster definition

$$y = 3.0249x^2 - 53.626x + 275.77$$
$$R^2 = 0.9919$$

≥ 3 cases in 4 weeks

≥ 5 cases in 4 weeks

≥ 7 cases in 4 weeks

≥ 10 cases in 4 weeks

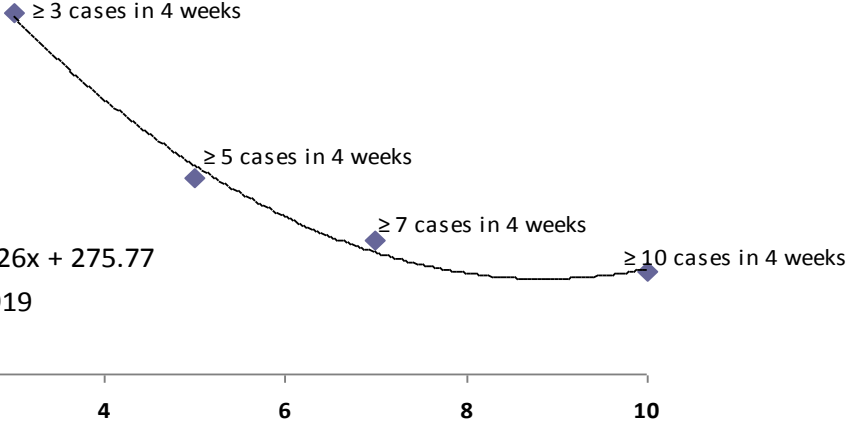

Supplement: MOESM5 [file 9443982]
